# Supplementary material
Source: PubMed Central journal article supplement (PMC1939938)
Supplement: NIHMS19348-supplement-t1.pdf [file NIHMS19348-supplement-t1.pdf]

**Table 1. Localization of  $\beta$ -gal positivity in human prostatectomy specimens.**

| Patient Samples | $\beta$ -gal staining     |                  |
|-----------------|---------------------------|------------------|
|                 | Area with hyperplasia/PIN | Area with cancer |
| 1               | +                         | -                |
| 2*              | -                         | +                |
| 3               | -                         | -                |
| 4               | ++                        | -                |
| 5               | +                         | -                |
| 6               | +                         | -                |
| 7**             | +++                       | -                |
| 8               | -                         | -                |
| 9               | -                         | -                |
| 10              | -                         | -                |
| 11              | ++                        | -                |
| 12              | ++                        | -                |

Note: +++ and ++ indicate strong  $\beta$ -gal staining easily detectable at 100X magnification; + indicates weak  $\beta$ -gal staining only detectable at 400X magnification. \* indicates Patient B of Figure 4f. \*\* indicates Patient A of Figure 4f.
