# Supplementary material
Source: PubMed Central journal article supplement (PMC1939938)

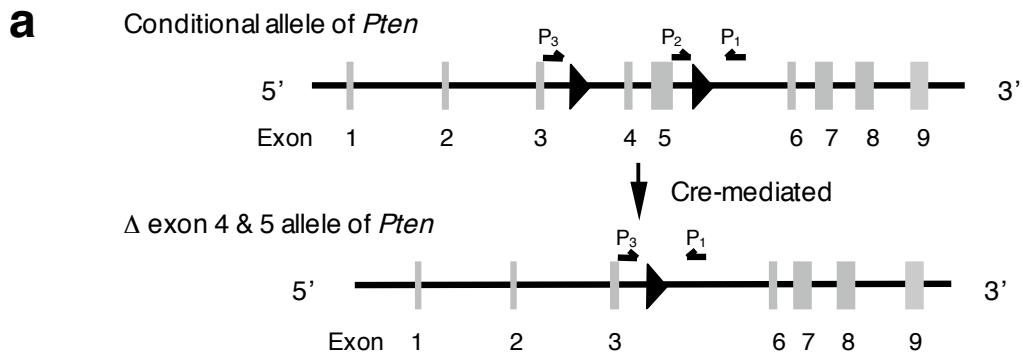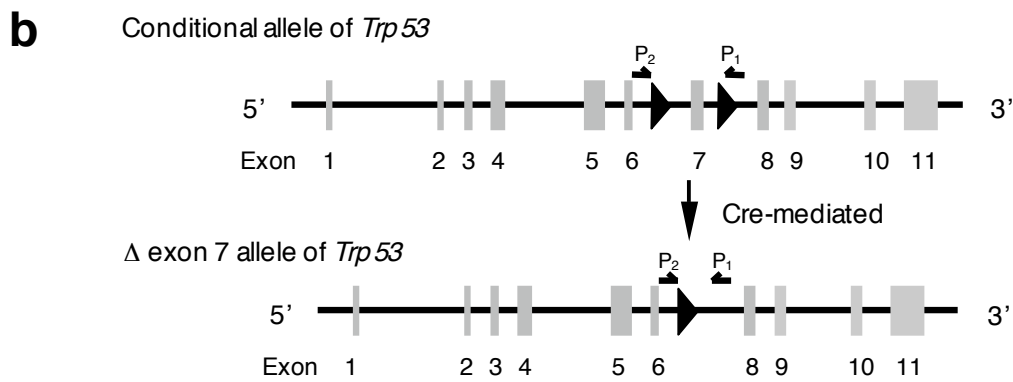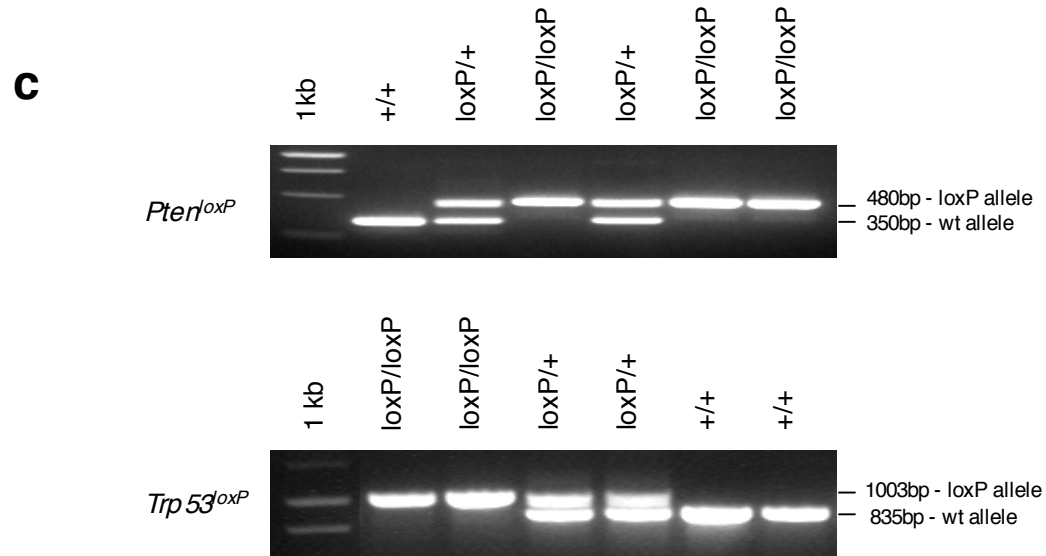

Supplement: NIHMS19348-supplement-s1.pdf [file NIHMS19348-supplement-s1.pdf]

**a**

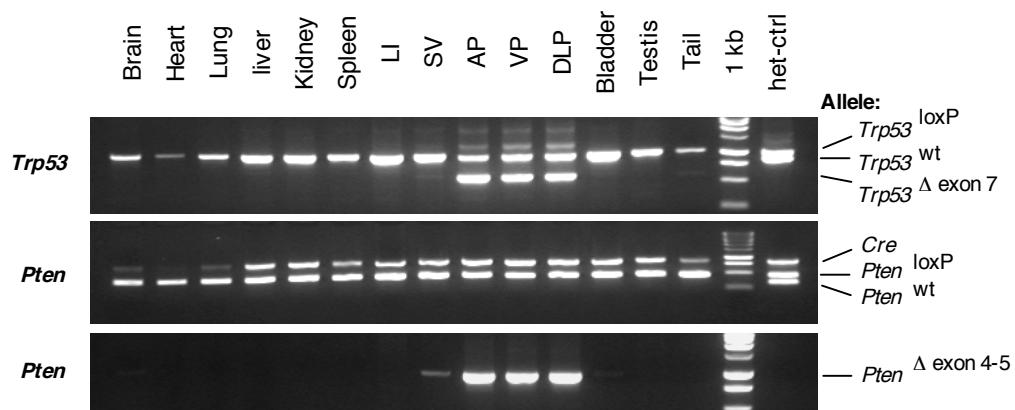

**b**

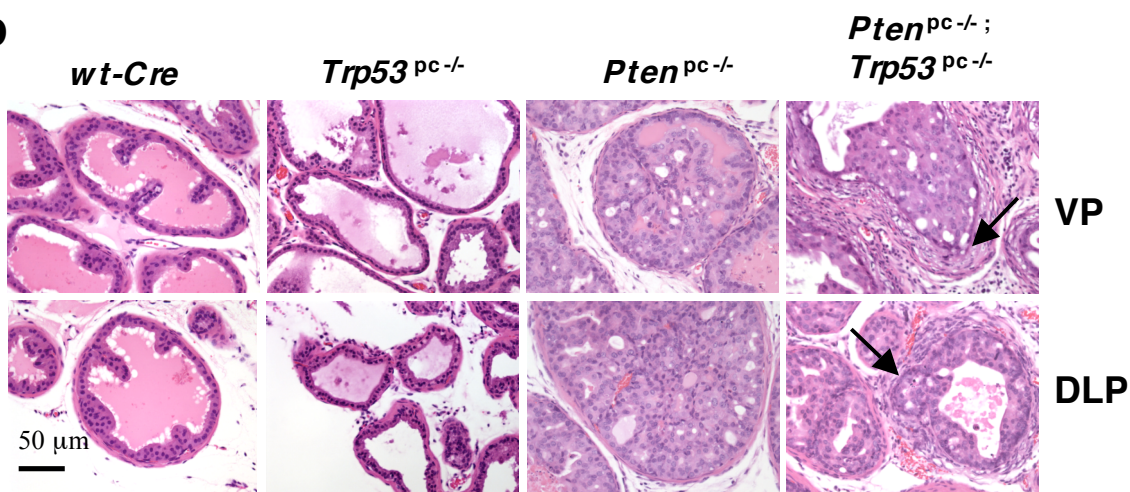

**c**

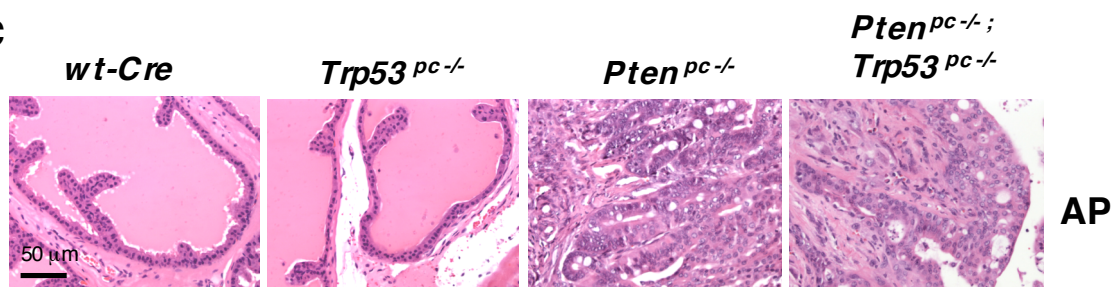

**d**

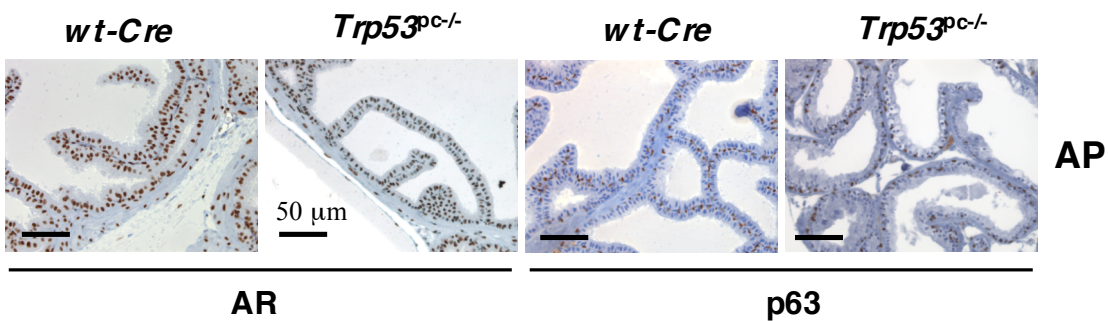

Supplement: NIHMS19348-supplement-s2.pdf [file NIHMS19348-supplement-s2.pdf]

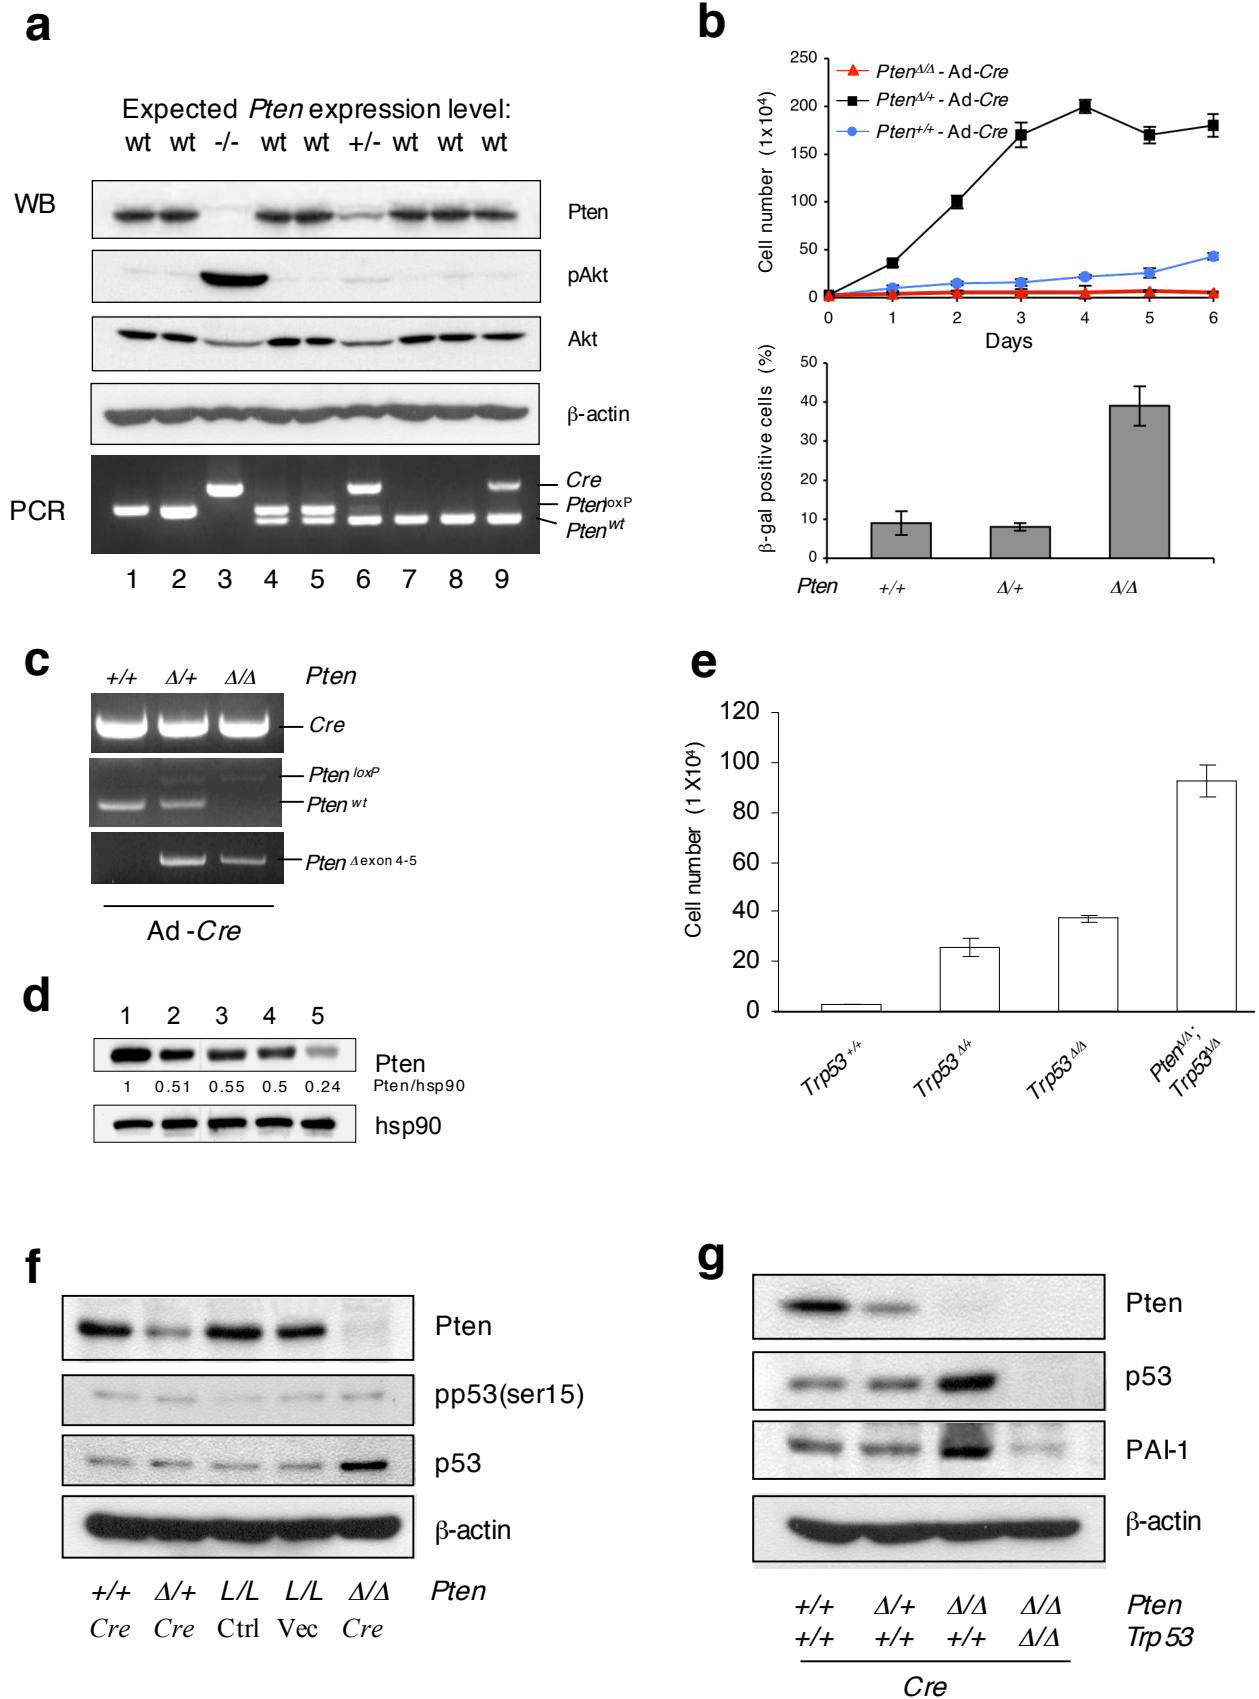

Supplement: NIHMS19348-supplement-s3.pdf [file NIHMS19348-supplement-s3.pdf]

**a**

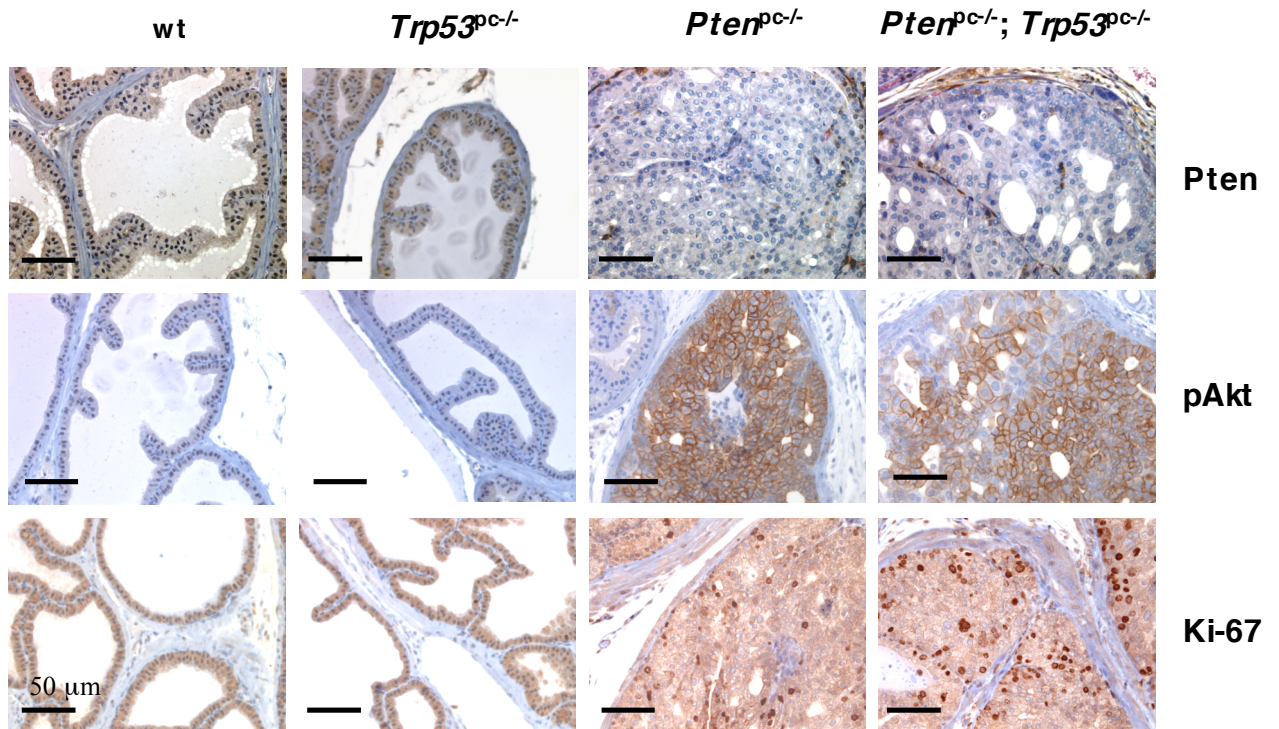

**b**

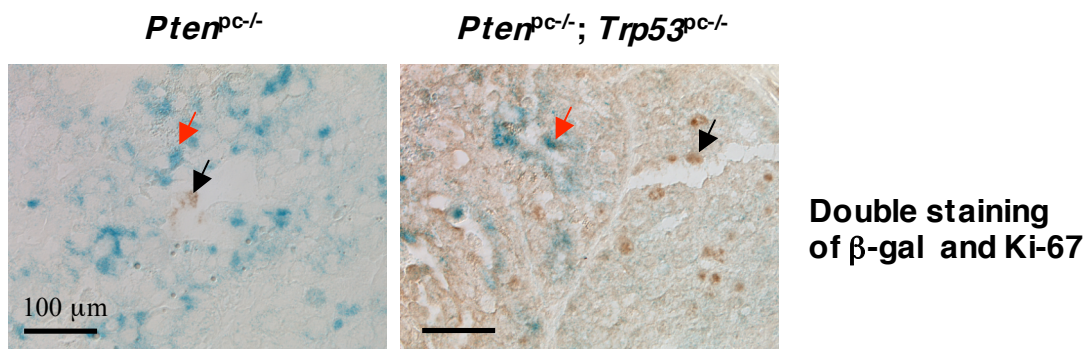

Supplement: NIHMS19348-supplement-s4.pdf [file NIHMS19348-supplement-s4.pdf]

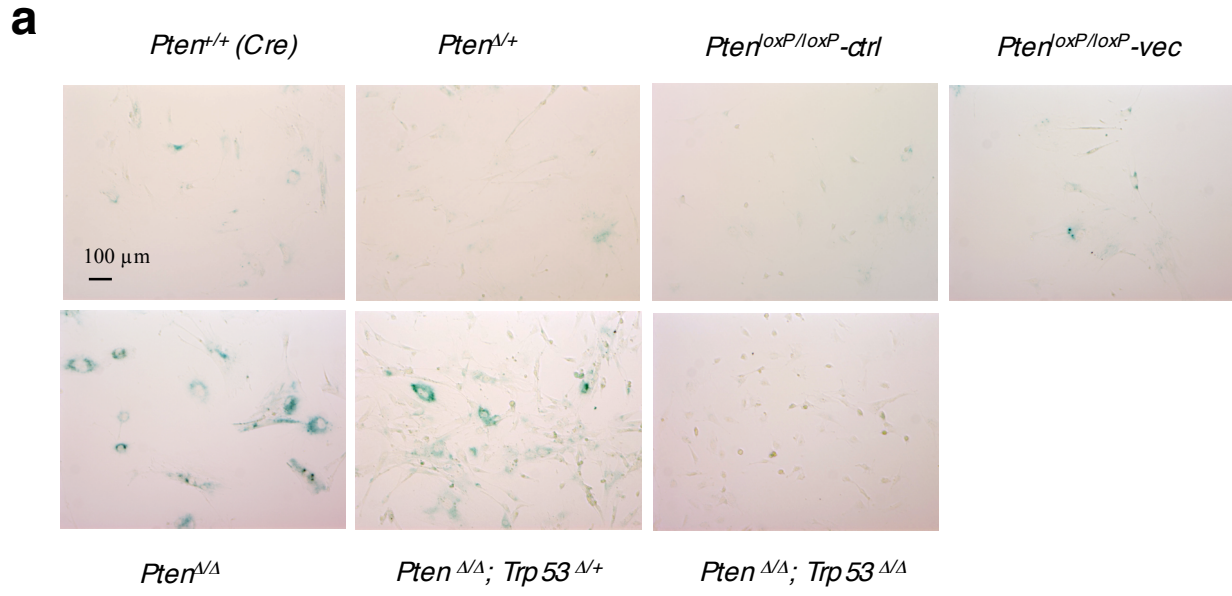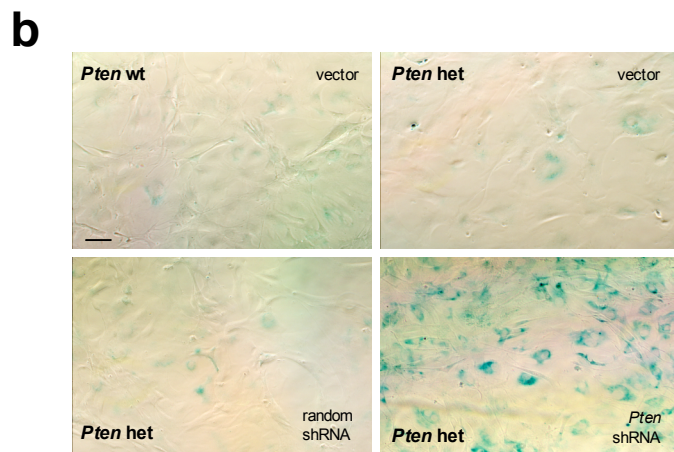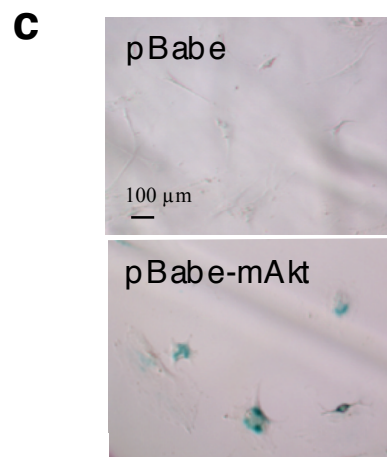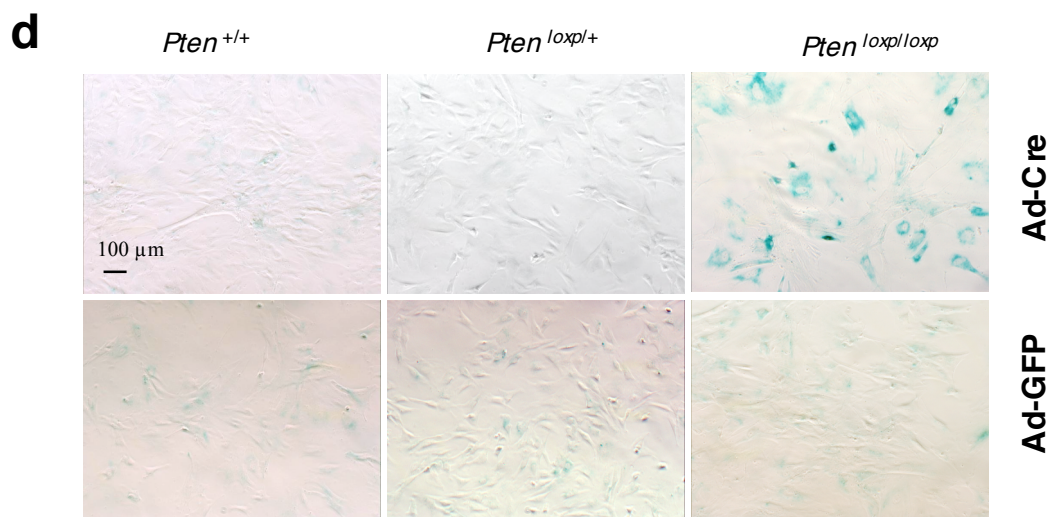

Supplement: NIHMS19348-supplement-s5.pdf [file NIHMS19348-supplement-s5.pdf]

**a**

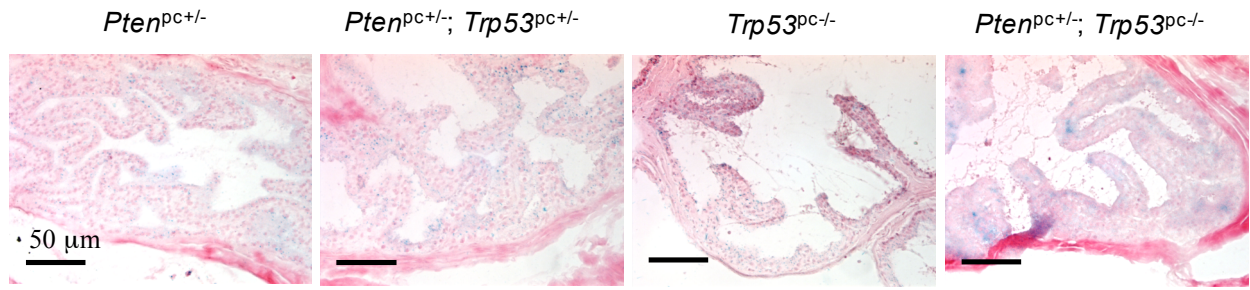

**b**

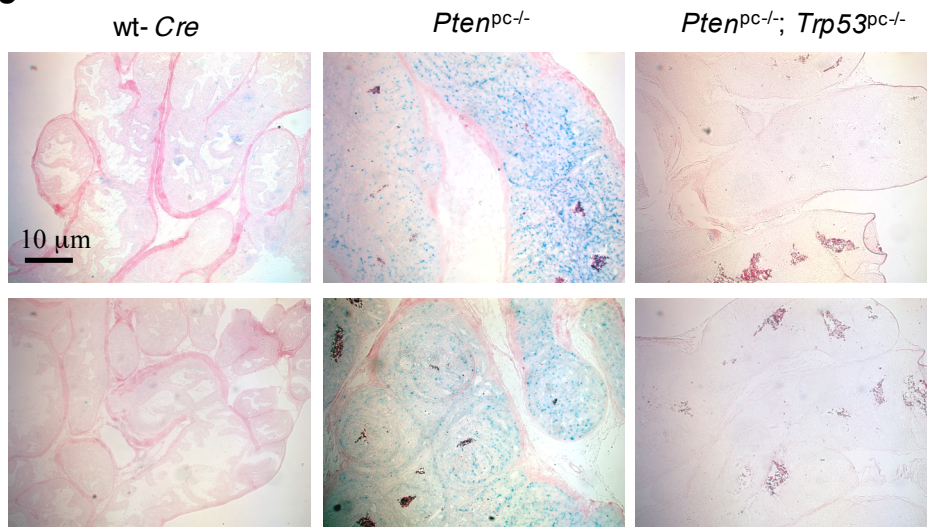

Supplement: NIHMS19348-supplement-s6.pdf [file NIHMS19348-supplement-s6.pdf]
